# Comorbid Diseases Interact with Breast Cancer to Affect Mortality in the First Year after Diagnosis—A Danish Nationwide Matched Cohort Study

Anne Gulbech Ording<sup>1\*</sup>, Jens Peter Garne<sup>2</sup>, Petra Mariann Witt Nyström<sup>3</sup>, Trine Frøslev<sup>1</sup>, Henrik Toft Sørensen<sup>1</sup>, Timothy L. Lash<sup>1,4</sup>

1 Department of Clinical Epidemiology, Aarhus University Hospital, Aarhus, Denmark, 2 Breast Clinic, Aalborg Hospital, Aalborg University Hospital, Aalborg, Denmark, 3 Department of Oncology, Uppsala University Hospital, Uppsala, Sweden, 4 Department of Epidemiology, Rollins School of Public Health, Emory University, Atlanta, Georgia, United States of America

## Abstract

**Background:** Survival of breast cancer patients with comorbidity, compared to those without comorbidity, has been well characterized. The interaction between comorbid diseases and breast cancer, however, has not been well-studied.

**Methods:** From Danish nationwide medical registries, we identified all breast cancer patients between 45 and 85 years of age diagnosed from 1994 to 2008. Women without breast cancer were matched to the breast cancer patients on specific comorbid diseases included in the Charlson comorbidity Index (CCI). Interaction contrasts were calculated as a measure of synergistic effect on mortality between comorbidity and breast cancer.

**Results:** The study included 47,904 breast cancer patients and 237,938 matched comparison women. In the first year, the strongest interaction between comorbidity and breast cancer was observed in breast cancer patients with a CCI score of  $\geq 4$ , which accounted for 29 deaths per 1000 person-years. Among individual comorbidities, dementia interacted strongly with breast cancer and accounted for 148 deaths per 1000 person-years within one year of follow-up. There was little interaction between comorbidity and breast cancer during one to five years of follow-up.

**Conclusions:** There was substantial interaction between comorbid diseases and breast cancer, affecting mortality. Successful treatment of the comorbid diseases or the breast cancer can delay mortality caused by this interaction in breast cancer patients.

**Citation:** Ording AG, Garne JP, Nyström PMW, Frøslev T, Sørensen HT, et al. (2013) Comorbid Diseases Interact with Breast Cancer to Affect Mortality in the First Year after Diagnosis—A Danish Nationwide Matched Cohort Study. PLoS ONE 8(10): e76013. doi:10.1371/journal.pone.0076013

**Editor:** Alok Deoraj, Florida International University, United States of America

**Received:** June 10, 2013; **Accepted:** August 19, 2013; **Published:** October 9, 2013

**Copyright:** © 2013 Ording et al. This is an open-access article distributed under the terms of the Creative Commons Attribution License, which permits unrestricted use, distribution, and reproduction in any medium, provided the original author and source are credited.

**Funding:** This study was supported by the Danish Agency for Science, Technology and Innovation, Karen Elise Jensen Foundation, the Clinical Epidemiology Research Foundation, Aarhus University, Aalborg Sygehus, Region North Denmark, Arkitekt Holger Hjørttenberg og hustru Dagmar Hjørttenbergs Foundation, and Inge og Jørgen Larsens Mindelegat Foundation. The funding sources had no role in study design, data collection and analysis, decision to publish, or preparation of the manuscript.

**Competing interests:** The authors have declared that no competing interests exist.

\* E-mail: ao@dce.au.dk

## Introduction

Breast cancer patients with comorbidities have poorer survival than breast cancer patients without comorbidity [1–5]. Few studies have compared mortality in breast cancer patients with coexisting diseases to mortality in a comparable cohort of women free of breast cancer. One study provided evidence of statistical interaction between breast cancer and the Charlson Comorbidity Index (CCI [6]) score at the time of breast cancer diagnosis, but this study was hospital-based, only included 5,663 older patients, and did not study specific comorbidities [7]. Whether the survival difference is due to only the

comorbidity or to an interaction between the comorbidity and breast cancer diagnosis is therefore not known. Such an interaction may have implications for disease treatment.

To resolve these limitations, we estimated the difference between the overall mortality rate and the expected mortality rate, given the baseline mortality rate, the effect of breast cancer on the mortality rate, and the effect of comorbidity on the mortality rate. We hypothesized *a priori* that the interaction may depend on the specific comorbid disease(s), and that the interaction may be different in the first year after breast cancer diagnosis than in subsequent years, since mortality in the first

year is more likely affected by delayed breast cancer diagnosis and by treatment and toxicities.

## Methods

This nationwide study included a cohort of Danish breast cancer patients aged 45 to 85 years who were diagnosed between 1994 and 2008, and a comparison cohort of women without breast cancer matched to the breast cancer patients on specific diseases included in the CCI [6]. The population of Denmark has access to a national health care system that is uniformly organized, tax supported, and provides free access to health care [8]. We used national medical and administrative databases in Denmark to identify the source population of women aged 45–85 years registered in the Civil Registration System (CRS). This registry contains information on civil and vital status for all Danish residents since 1968. Each resident is assigned a unique civil personal registration number (CPR) that permits accurate linkage between registries [9].

### Ascertainment of the breast cancer and comparison cohorts

The Danish Cancer Registry (DCR) contains nearly complete data on cancers diagnosed in Denmark [10,11]. Diagnoses were coded according to the *International Classification of Diseases*, revision 7 (ICD-7) until 2003, when recorded diagnoses were converted to ICD-10. From the DCR, we identified female breast cancer patients diagnosed between 1994 and 2008 (ICD-10 code: DC50). We used the CRS to select up to five comparison women from the general population, matched to each breast cancer patient on age and history of the specific comorbidities defined below. The women in the comparison cohort had to be free of breast cancer on the date of breast cancer diagnosis for the corresponding case. The index date was defined as the breast cancer diagnosis date for cases in the breast cancer cohort and also for the women matched to them in the comparison cohort.

**Comorbidity.** The Danish National Registry of Patients (NRP) has recorded all non-psychiatric discharge diagnoses from inpatient admissions since 1977 and from outpatient clinic visits since 1995 [12]. Diagnoses were coded according to ICD-8 1977–1993 and ICD-10 thereafter. The Charlson Comorbidity Index (CCI) provides a summary score based on the presence and severity of 19 individual diseases. It has been validated as a predictor of mortality in breast cancer patients [6]. We used the NRP to identify all recorded diagnoses of diseases, except for breast cancer, included in the CCI for women in the two study cohorts during the ten years before their index date.

**Mortality.** With linkage to the CRS, we followed the breast cancer and matched cohorts until death, emigration or 31 December 2011. Because members of the comparison cohort had no history of breast cancer, we did not ascertain breast-cancer specific or other cause-specific mortality.

**Statistical analysis.** We calculated the frequency of women in the breast cancer cohort and the matched comparison cohort within categories of age ( $\leq 50$ , 51–60, 61–70, 71–80, 81–85 years), year of index date, CCI score (0, 1, 2–3,  $\geq 4$ ), individual

diseases included in the CCI index (presence/absence), and, for the breast cancer cohort, cancer stage (local, regional, distant, unknown).

Crude mortality rates with 95% confidence intervals (CIs) were calculated within categories of baseline variables for 0–1 and  $>1$ –5 years of follow-up. The matching was dissolved when stratifying the follow-up period, so age-standardized mortality rates were calculated using age weights from the breast cancer cohort on the index date as the standard.

We calculated the interaction contrast (IC), which measures the departure of the mortality rates from an additive model [13]. It is calculated as the difference between the rate differences (mortality rate in the breast cancer cohort minus the mortality rate in the comparison cohort) in the strata with and without comorbidity [13]. We used proportional hazards regression to compute crude hazard ratios as a measure of mortality rate ratios (MRRs), and for the effect of individual diseases, we adjusted for presence of other CCI diseases. For the  $>1$ –5 year MRRs, we also adjusted the estimates for age group at diagnosis and year of index date in three categories (1994–1999, 2000–2004, and 2005–2008).

Although chronic pulmonary disease and “any tumor” were prevalent comorbidities in the breast cancer cohort, these diseases did not interact with breast cancer to affect mortality rates. We therefore *a posteriori* repeated all interaction analyses excluding these diseases from the CCI.

The initial cohorts consisted of 48,292 breast cancer patients and 237,938 matched women from the general population. In the breast cancer cohort, 390 (0.81%) women were not matched with any woman in the comparison population. Of these unmatched breast cancer patients, 20% were between 81 and 85 years of age, compared to 9.1% of the matched breast cancer patients. A larger proportion of the unmatched breast cancer patients had a CCI score of  $\geq 4$  compared to the matched breast cancer patients (15% vs. 0.9%). Therefore, the combination of old age and multiple comorbidities precluded matching on both age and specific comorbid conditions, resulting in exclusion of these breast cancer patients from the analyses.

Analyses were conducted with SAS version 9.2 (SAS Institute Inc., Cary, NC). This study was approved by the Danish Data Protection Agency (2011-41-6174). No further permissions are needed to conduct studies with no intervention or participant contact in Denmark.

## Results

Characteristics of the breast cancer and matched cohorts are presented in Table 1. The median age at breast cancer diagnosis was 63.2 years (interquartile range: 55.2 to 73.3 years). The most frequent CCI diseases were cerebrovascular disease (3.7%), chronic pulmonary disease (4.3%), and “any tumor” (3.9%), while hemiplegia (0.1%), leukemia (0.1%), moderate to severe liver disease (0.1%), and AIDS ( $<0.1\%$ ) were among the more rare comorbid diseases. In the breast cancer cohort, 47% had local disease, 40% had regional disease, 6.6% had distant disease, and 7.2% had an unknown breast cancer stage at diagnosis.

**Table 1.** Characteristics of the breast cancer cohort and the matched population cohort.

|                                       | Breast cancer cohort (n=47,904), Number (%) | Matched population cohort (n=237,938), Number (%) |
|---------------------------------------|---------------------------------------------|---------------------------------------------------|
| <b>Age group (years)</b>              |                                             |                                                   |
| ≤50                                   | 5,085 (11)                                  | 25,560 (11)                                       |
| 51-60                                 | 13,853 (29)                                 | 68,975 (29)                                       |
| 61-70                                 | 14,357 (30)                                 | 71,193 (30)                                       |
| 71-80                                 | 10,262 (21)                                 | 50,710 (21)                                       |
| 81-85                                 | 4,347 (9.1)                                 | 21,500 (9.0)                                      |
| <b>Index year</b>                     |                                             |                                                   |
| 1994                                  | 2,726 (5.6)                                 | 13,564 (5.7)                                      |
| 1995                                  | 2,743 (5.7)                                 | 13,636 (5.7)                                      |
| 1996                                  | 2,890 (6.0)                                 | 14,387 (6.1)                                      |
| 1997                                  | 2,883 (6.0)                                 | 14,356 (6.0)                                      |
| 1998                                  | 2,958 (6.2)                                 | 14,699 (6.2)                                      |
| 1999                                  | 3,087 (6.4)                                 | 15,325 (6.4)                                      |
| 2000                                  | 3,137 (6.6)                                 | 15,601 (6.6)                                      |
| 2001                                  | 3,204 (6.7)                                 | 15,930 (6.7)                                      |
| 2002                                  | 3,407 (7.1)                                 | 16,911 (7.1)                                      |
| 2003                                  | 3,329 (7.0)                                 | 16,504 (6.9)                                      |
| 2004                                  | 3,283 (6.8)                                 | 16,268 (6.8)                                      |
| 2005                                  | 3,279 (6.8)                                 | 16,247 (6.8)                                      |
| 2006                                  | 3,463 (7.2)                                 | 17,162 (7.2)                                      |
| 2007                                  | 3,497 (7.2)                                 | 17,367 (7.3)                                      |
| 2008                                  | 4,018 (8.4)                                 | 19,981 (8.4)                                      |
| <b>Original CCI score</b>             |                                             |                                                   |
| 0                                     | 38,427 (80.2)                               | 192,135 (81)                                      |
| 1                                     | 5303 (11)                                   | 26,515 (11.1)                                     |
| 2                                     | 2,925 (6.1)                                 | 14,432 (6.1)                                      |
| 3                                     | 828 (1.7)                                   | 3,389 (1.4)                                       |
| 4                                     | 205 (0.1)                                   | 563 (0.2)                                         |
| 5                                     | 25 (0.01)                                   | 33 (0.01)                                         |
| 6                                     | 167 (0.4)                                   | 826 (0.4)                                         |
| 7                                     | 23 (0.1)                                    | 44 (0.02)                                         |
| 8                                     | 1 (0)                                       | 1 (0)                                             |
| <b>Individual diseases in the CCI</b> |                                             |                                                   |
| Myocardial infarction                 | 680 (1.4)                                   | 3124 (1.3)                                        |
| Congestive heart failure              | 840 (1.8)                                   | 3,724 (1.8)                                       |
| Peripheral vascular disease           | 836 (1.8)                                   | 3,845 (1.6)                                       |
| Cerebrovascular disease               | 1,792 (3.7)                                 | 8,479 (3.6)                                       |
| Dementia                              | 231 (0.5)                                   | 1,028 (0.4)                                       |
| Chronic pulmonary disease             | 2,054 (4.3)                                 | 9,804 (4.1)                                       |
| Connective tissue disease             | 934 (2.0)                                   | 4,393 (1.9)                                       |
| Ulcer disease                         | 819 (1.7)                                   | 3,808 (2.0)                                       |
| Mild liver disease                    | 232 (0.5)                                   | 1,016 (0.4)                                       |
| Diabetes I and II                     | 1,229 (2.6)                                 | 5,668 (2.0)                                       |
| Hemiplegia                            | 42 (0.1)                                    | 165 (0.1)                                         |
| Moderate to severe renal disease      | 209 (0.4)                                   | 859 (0.4)                                         |
| Diabetes with end organ damage        | 472 (1.0)                                   | 2,066 (0.9)                                       |
| Any tumor (other than breast cancer)  | 1,856 (3.9)                                 | 8,967 (3.8)                                       |
| Leukemia                              | 43 (0.1)                                    | 192 (0.01)                                        |
| Lymphoma                              | 101 (0.2)                                   | 424 (0.2)                                         |
| Moderate to severe liver disease      | 39 (0.1)                                    | 139 (0.1)                                         |
| Metastatic solid tumor                | 188 (0.4)                                   | 864 (0.4)                                         |
| AIDS                                  | 1 (0)                                       | 5 (0)                                             |
| <b>Stage</b>                          |                                             |                                                   |
| Local                                 | 22,338 (47)                                 |                                                   |

**Table 1 (continued).**

|          | Breast cancer cohort (n=47,904), Number (%) | Matched population cohort (n=237,938), Number (%) |
|----------|---------------------------------------------|---------------------------------------------------|
| Regional | 18,976 (40)                                 |                                                   |
| Distant  | 3,139 (6.6)                                 |                                                   |
| Unknown  | 3,451 (7.2)                                 |                                                   |

doi: 10.1371/journal.pone.0076013.t001

**Table 2.** Mortality rates, adjusted hazard ratios (HRs), and interaction contrasts (ICs) by Charlson Comorbidity Index (CCI) scores for the breast cancer cohort and the matched comparison cohort for 1 year and >1–5 years of follow-up.

|                                   | CCI score | No. of deaths | Person-years | Crude rate (95%CI)/ 1000 person-years <sup>A</sup> | IC (95% CI) /1000 person-years | Adj HR (95% CI) <sup>B, C</sup> |
|-----------------------------------|-----------|---------------|--------------|----------------------------------------------------|--------------------------------|---------------------------------|
| <b>0–1 year of follow-up</b>      |           |               |              |                                                    |                                |                                 |
| Comparison                        | 0         | 1,714         | 191,247      | 9.0 (8.5, 9.4)                                     |                                | Ref                             |
| Breast cancer                     | 0         | 1,974         | 37,264       | 53 (51, 55)                                        | Ref                            | 6.1 (5.7, 6.6)                  |
| Comparison                        | 1         | 1,010         | 26,021       | 39 (37, 41)                                        |                                | Ref                             |
| Breast cancer                     | 1         | 500           | 4,999        | 100 (92, 109)                                      | 17 (7.8, 27)                   | 2.7 (2.4, 3.0)                  |
| Comparison                        | 2-3       | 1,407         | 17,092       | 82 (78, 87)                                        |                                | Ref                             |
| Breast cancer                     | 2-3       | 480           | 3,483        | 138 (126, 151)                                     | 12 (-1.8, 25)                  | 1.6 (1.5, 1.8)                  |
| Comparison                        | ≥4        | 291           | 1,299        | 224 (200, 251)                                     |                                | Ref                             |
| Breast cancer                     | ≥4        | 106           | 357          | 297 (246, 360)                                     | 29 (-33, 91)                   | 1.5 (1.2, 1.9)                  |
| <b>&gt;1–5 years of follow-up</b> |           |               |              |                                                    |                                |                                 |
| Comparison                        | 0         | 10,411        | 676,070      | 18 (17, 19)                                        |                                | Ref                             |
| Breast cancer                     | 0         | 6,244         | 120,248      | 57 (54, 60)                                        | Ref                            | 3.6 (3.4, 3.7)                  |
| Comparison                        | 1         | 4,217         | 83,134       | 41 (38, 44)                                        |                                | Ref                             |
| Breast cancer                     | 1         | 1,244         | 14,604       | 75 (66, 85)                                        | -4.4 (-9.1, 0.4)               | 1.7 (1.6, 1.9)                  |
| Comparison                        | 2-3       | 3,736         | 51,098       | 58 (53, 62)                                        |                                | Ref                             |
| Breast cancer                     | 2-3       | 1,034         | 9,532        | 94 (79, 108)                                       | -2.5 (-9.6, 4.1)               | 1.5 (1.4, 1.6)                  |
| Comparison                        | ≥4        | 403           | 3,249        | 111 (86, 136)                                      |                                | Ref                             |
| Breast cancer                     | ≥4        | 124           | 822          | 142 (80, 203)                                      | -7.7 (-39, 23)                 | 1.2 (0.9, 1.4)                  |

<sup>A</sup> Crude rates for 0–1 year of follow-up. For >1–5 years of follow-up, the matching was dissolved and standardized rates were calculated.<sup>B</sup> Matching dissolved.<sup>C</sup> For >1–5 years of follow-up, HRs were adjusted for age group and index years.

doi: 10.1371/journal.pone.0076013.t002

## Mortality

Table 2 shows the mortality rates, ICs, and MRRs for 0–1 and >1–5 year mortality in the breast cancer and comparison cohorts. For all CCI score categories, the breast cancer patients had higher mortality rates than the matched cohort. The survival disparities were more marked in the first year of follow-up than in years one to five.

In the first year of follow-up, the interaction between breast cancer and comorbidity accounted for 17 deaths per 1000 person-years (PY) (95% CI: 7.8, 27) for a CCI score of 1, 12 deaths per 1000 PY (95% CI: -1.8, 25) for CCI scores of 2–3, and 29 deaths per 1000 PY (95% CI: -33, 91) for a CCI score ≥4. These represented 17%, 9%, and 10% of total mortality rates, respectively, among the breast cancer patients with comorbid diseases. When the ICs were stratified on breast cancer stage, the interaction observed for the CCI score was primarily driven by distant and unknown stage cancer, as shown in Table 3. The comparison cohort members followed their matched breast cancer patient into the stage category in

these stage-stratified analyses. In the 1–5 year survivor cohort, the ICs were near null.

Although history at index date of chronic pulmonary disease and “any tumor” were relatively common in the breast cancer cohort, the 0–1 year ICs were only 8.6/1000 PY (95% CI: -8.1, 25) for chronic pulmonary disease and -13/1000 PY (95% CI -31, 5.3) for “any tumor.” When we repeated all analyses for the CCI scores without assigning weights to these two disease types, the 0–1 year overall estimates of the ICs rose from 17 to 21/1000 PY (95% CI: 11, 32) for a CCI score of 1, from 12 to 31/1000 PY (95% CI: 11, 52) for a CCI score of 2–3, and from 29 to 67/1000 PY (95% CI: -19, 152) for a CCI score of ≥4. The ICs for the >1–5 year survivor cohort increased only slightly.

The interaction contrasts between breast cancer and the specific Charlson comorbid diseases were larger during the first year of follow-up than during years one to five of follow-up. The disease with the largest IC in the first year of follow-up was dementia (IC=148/1000PY (95% CI: 58, 239)). When we stratified analyses by breast cancer stage, the interaction between breast cancer and dementia was driven by interaction

**Table 3.** Interaction contrasts (ICs) and 95% confidence intervals by Charlson comorbidity (CCI) score for 1 year of follow-up.

| Stage    | Interaction contrast/1000<br>CCI score 1 vs. 0 | Interaction contrast/1000<br>CCI score 1 vs. 0 | Interaction contrast/1000<br>CCI score $\geq 4$ vs. 0 |
|----------|------------------------------------------------|------------------------------------------------|-------------------------------------------------------|
| Local    | 7.8 (-16, 0.53)                                | -19 (-33, -4.9)                                | -101 (-168, -35)                                      |
| Regional | 0.59 (-11, 12)                                 | -12 (-30, 5.9)                                 | -43 (-125, 39)                                        |
| Distant  | 228 (115, 341)                                 | 150 (28, 272)                                  | 370 (11, 729)                                         |
| Unknown  | 76 (22, 130)                                   | 91 (25, 157)                                   | 326 (30, 624)                                         |

<sup>A</sup> Crude rates for 0–1 year of follow-up. For >1–5 years of follow-up, the matching was dissolved and standardized rates were calculated.

<sup>B</sup> Matching dissolved.

<sup>C</sup> For >1–5 years of follow-up, HRs were adjusted for age group and index years.

doi: 10.1371/journal.pone.0076013.t003

in the stratum of distant-stage cancers (IC =1150/1000PY (95% CI: 162, 2137)). The ICs for dementia in the strata of local-stage (IC=44/1000PY (95% CI: -68, 155) and regional-stage (IC=-31/1000PY (95% CI: -145, 82) cancers were much smaller. The stage distribution among breast cancer patients with dementia was skewed toward later stage at diagnosis compared with breast cancer patients without dementia. In the first year after breast cancer diagnosis, the mortality rate of breast cancer patients with dementia exceeded that of breast cancer patients without dementia in local-, regional-, and distant-stage strata, yielding a stage-adjusted MRR of 5.0 (95% CI: 3.6, 6.8).

In the first year after diagnosis, there was also interaction between breast cancer and other comorbid diseases, including metastatic solid tumors (IC=66/1000PY, 17% of the total mortality rate), mild liver disease (IC=56/1000PY, 37% of the total mortality rate), moderate to severe renal disease (IC=43/1000PY, 31% of the total mortality rate), and diabetes with end-organ damage (IC=42/1000PY, 27% of the total mortality rate).

In the period one to five years after the index date, there was some interaction between breast cancer and leukemia (IC=61/1000PY, 39% of the total mortality rate), moderate to severe liver disease (IC=49/1000PY, 25% of the total mortality rate), mild liver disease (IC= 19/1000PY, 16% of the total mortality rate), and diabetes with end-organ damage (IC= 14/1000PY, 12% of the total mortality rate). Data for the individual Charlson diseases are presented in Figure 1 and Figure 2 and in Table S1 and Table S2.

## Discussion

In this large, population-based cohort study from Denmark, including more than 47,000 breast cancer patients and 200,000 matched women from the general population, we found that overall mortality in the first year after breast cancer diagnosis was influenced by interaction between breast cancer and comorbid diseases present at diagnosis. The interaction was most pronounced in the strata of distant and unknown breast cancer stage. Among individual diseases, dementia interacted most strongly with breast cancer, but metastatic solid tumors, mild liver disease, moderate to severe renal disease, and diabetes with end-organ damage also showed strong

interactions. In the >1–5 year survivor cohort, there was no strong interaction with the CCI summary comorbidity score, although some interaction was observed with leukemia, moderate to severe liver disease, mild liver disease, and diabetes with end-organ damage.

A particular strength of this study is the inclusion of a comparison cohort free of breast cancer matched to the breast cancer cohort on specific comorbidities, which allows for the study of disease-specific clinical interactions between breast cancer and comorbidity. A concomitant limitation was our inability to study disease-specific causes of death, since members of the comparison cohort were unlikely to die of breast cancer. We included all women with breast cancer diagnoses from the entire country and achieved complete follow-up through the CRS. Registration of breast cancer in the DCR is nearly complete [14]. The validity of the CCI diseases recorded in the NRP has been shown to be consistently high [15]. However, outpatient data were not included before 1995, so under-registration could bias results. Such misclassification should bias the comparison of mortality in breast cancer patients with mortality in the comparison cohort toward the null, since the misclassification rate should not depend on the subsequent breast cancer diagnosis. The impact of misclassification on estimates of the interaction contrast is less predictable [16]. In addition, we lacked information on potential other confounders, such as lifestyle-related factors.

The interaction between breast cancer and comorbidity was mainly observed during the first year after breast cancer diagnosis, possibly due to lack of focus on care for comorbid diseases during cancer treatment. A recent study based on SEER data showed equal quality of care for comorbid conditions in breast cancer patients and non-cancer controls, but this was at three years after the cancer diagnosis [17]. In the time period one to five years after breast cancer diagnosis, we observed no substantial interaction between breast cancer and comorbid diseases, possibly due to equal quality of care of comorbid conditions in the period after completion of primary breast cancer treatment.

Interaction contrasts were negative in some analyses, although often imprecisely measured. Negative interaction contrasts were observed most often in the local and regional stage categories. This pattern suggests that prevalent and well-managed comorbidities brought breast cancer patients to

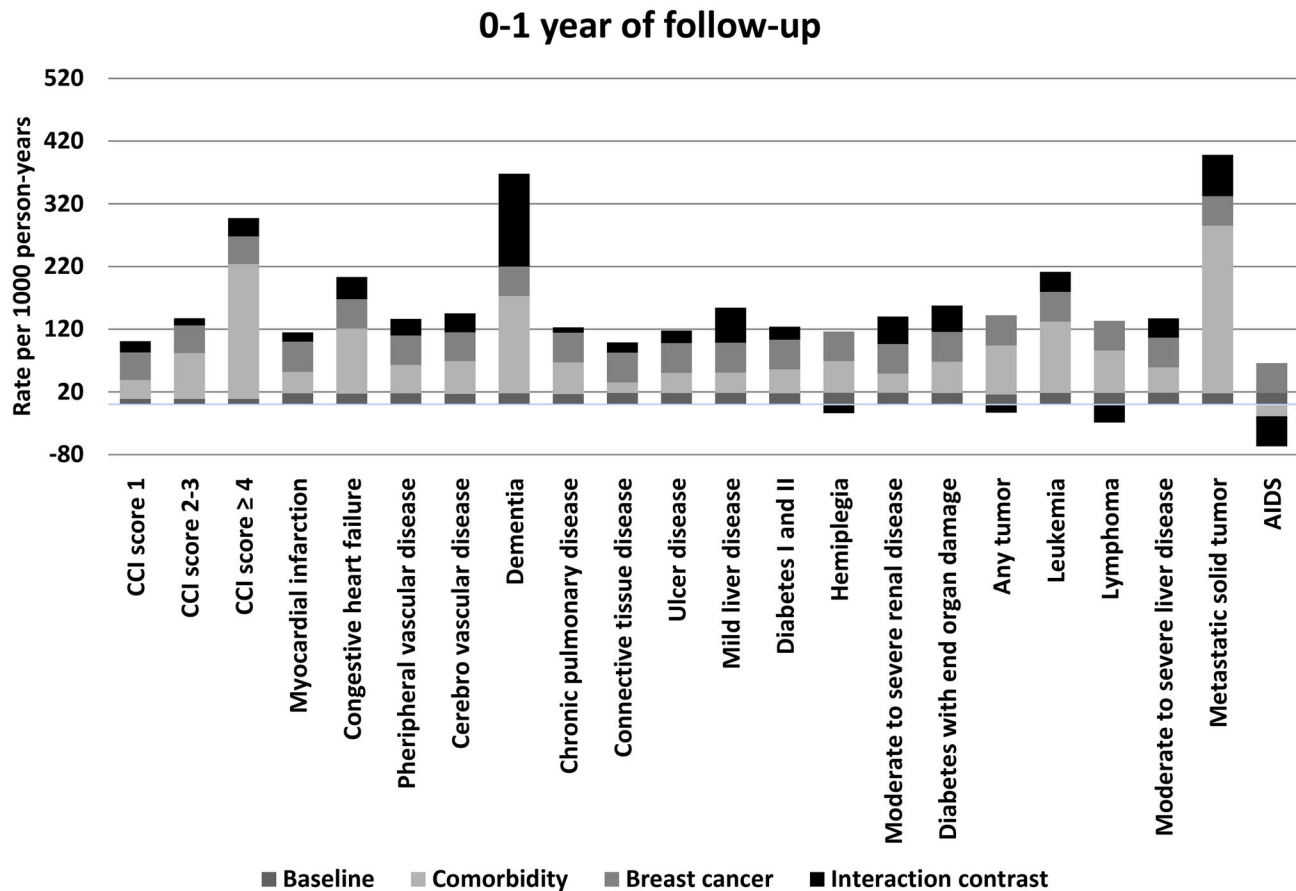

**Figure 1. Mortality rates per 1,000 person-years for 0–1 year of follow-up by Charlson Comorbidity Index (CCI) scores and individual diseases in this comorbidity index.** The total mortality rate contribution is represented by the baseline rate, comorbidity, breast cancer, and interaction.

doi: 10.1371/journal.pone.0076013.g001

medical attention and diagnosis sooner, resulting in a stage-shift to earlier and more treatable breast cancers within the early-stage categories. In later stage categories, breast cancer patients with severe comorbidity may be diagnosed with breast cancer late and at an unfavorable cancer stage, as some comorbid conditions could mask evidence of this cancer [18]. We have clearly demonstrated this explanation for breast cancer patients with a CCI score  $\geq 4$  and for patients with dementia. Breast cancer patients with severe comorbidity may not receive cancer treatment in accordance with the treatment guidelines [19,20], because the comorbidity, its treatment, the cancer treatment, or its side-effects preclude the most aggressive treatments. Less aggressive treatment of cancer patients with dementia has been previously documented [21–23], which provides one explanation for the excess mortality rate for breast cancer patients with dementia in the first year after their breast cancer diagnosis.

To our knowledge, this study is the first to report specific interaction contrasts between breast cancer and the CCI score or individual diseases included in the CCI that affect the mortality rate. Studies that lacked a cohort free of breast

cancer have shown that comorbidity and associated suboptimal breast cancer treatment increase the risk of death without recurrence in older women [2]. Other studies did not report increased mortality due to causes other than breast cancer in breast cancer cohorts compared to the general population [24,25]. However, a Swedish study reported increased mortality associated with diseases of the heart, pulmonary circulation (pulmonary embolism and other diseases of pulmonary vessels), and gastric diseases [26]. In addition to the interaction with dementia, we also observed interactions between breast cancer and renal diseases, liver diseases, diabetes, and other cancers. Compared to breast cancer patients without these comorbid diseases, patients with these comorbidities may not tolerate adjuvant chemotherapy and radiotherapy as well [27,28].

In summary, our study shows a clinical interaction between prevalent comorbidities and overall mortality in breast cancer patients—particularly within one year after breast cancer diagnosis and mainly in patients with distant and unknown stage breast cancer. There was substantial interaction between dementia and breast cancer, suggesting that these patients

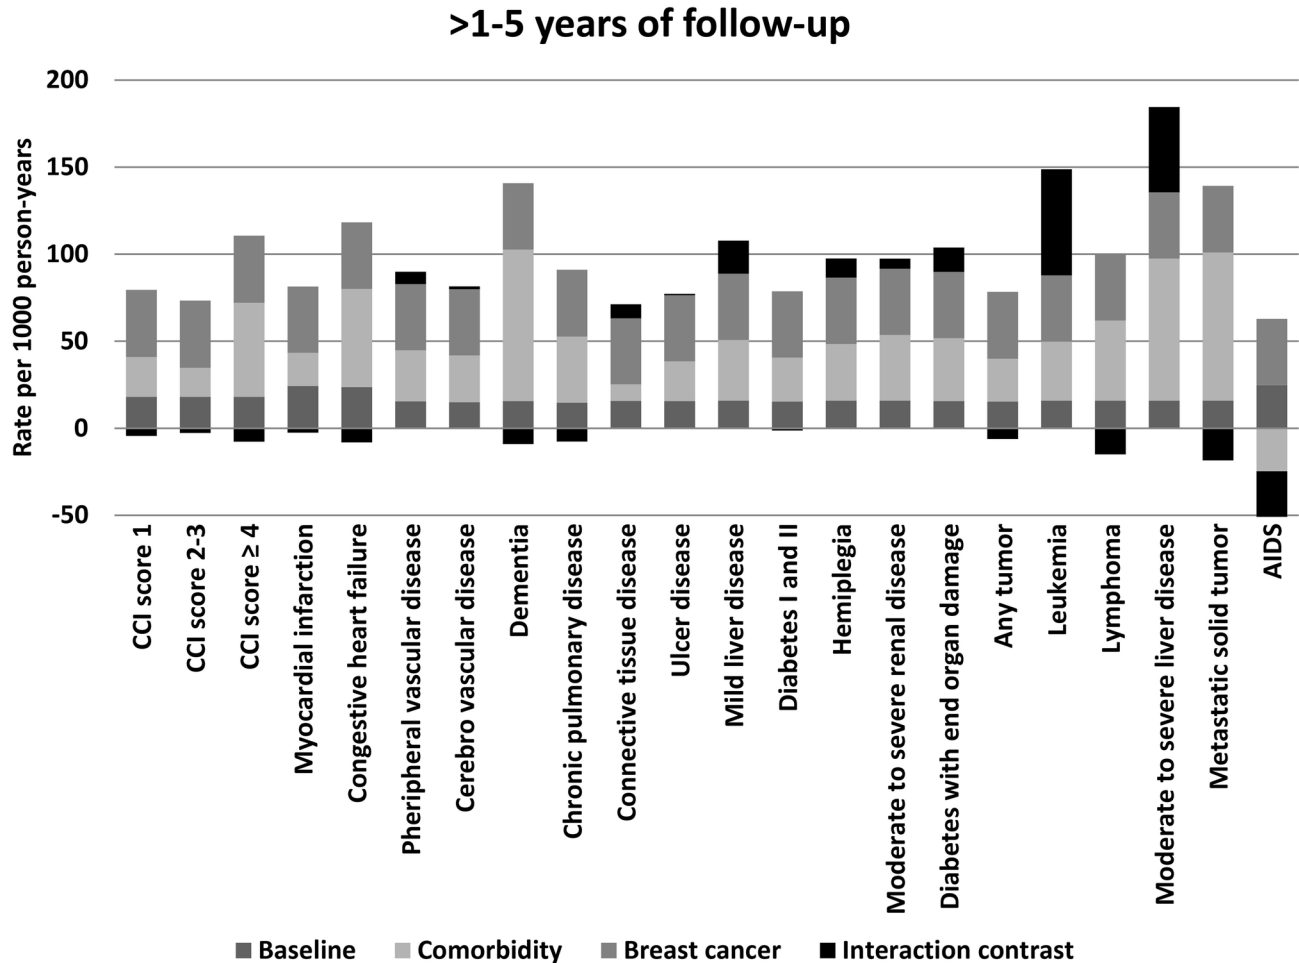

**Figure 2. Standardized mortality rates per 1,000 person-years for >1–5 years of follow-up by Charlson Comorbidity Index (CCI) scores and individual diseases in the CCI.** The total mortality rate contribution is represented by the baseline rate, comorbidity, breast cancer, and interaction.

doi: 10.1371/journal.pone.0076013.g002

tend to have breast cancer diagnosed at later stages. Successful treatment of the comorbid diseases or the breast cancer can delay mortality caused by this interaction.

### Supporting Information

**Table S1. Crude mortality rates, adjusted HRs, and interaction contrasts (ICs) by individual diseases in the Charlson Comorbidity Index for the breast cancer cohort and the matched comparison cohort during 0-1 year of follow-up.** (DOCX)

**Table S2. Standardized mortality rates, adjusted HRs, and interaction contrasts (ICs) by individual diseases in the Charlson Comorbidity Index for the breast cancer cohort and the matched comparison cohort during 1-5 years of follow-up.** (DOCX)

### Author Contributions

Conceived and designed the experiments: AGO HTS TLL. Performed the experiments: AGO TF. Analyzed the data: AGO TF HTS TLL. Wrote the manuscript: AGO TF JPG PMWN HTS TLL.

### References

1. Yancik R, Wesley MN, Ries LA, Havlik RJ, Edwards BK et al. (2001) Effect of age and comorbidity in postmenopausal breast cancer

patients aged 55 years and older. *JAMA* 285: 885-892. doi:10.1001/jama.285.7.885. PubMed: 11180731.

2. Ring A, Sestak I, Baum M, Howell A, Buzdar A et al. (2011) Influence of comorbidities and age on risk of death without recurrence: A retrospective analysis of the arimidex, tamoxifen alone or in combination trial. *J Clin Oncol* 29: 4266-4272. doi:10.1200/JCO.2011.35.5545. PubMed: 21990403.
3. Cronin-Fenton DP, Nørgaard M, Jacobsen J, Garne JP, Ewertz M et al. (2007) Comorbidity and survival of Danish breast cancer patients from 1995 to 2005. *Br J Cancer* 96: 1462-1468. PubMed: 17406360.
4. Patnaik JL, Byers T, Diguseppi C, Denberg TD, Dabelea D (2011) The influence of comorbidities on overall survival among older women diagnosed with breast cancer. *J Natl Cancer Inst* 103: 1101-1111. doi: 10.1093/jnci/djr188. PubMed: 21719777.
5. Land LH, Dalton SO, Jensen MB, Ewertz M (2012) Impact of comorbidity on mortality: A cohort study of 62,591 Danish women diagnosed with early breast cancer, 1990-2008. *Breast Cancer Res Treat* 131: 1013-1020. doi:10.1007/s10549-011-1819-1. PubMed: 22002567.
6. Charlson ME, Pompei P, Ales KL, MacKenzie CR (1987) A new method of classifying prognostic comorbidity in longitudinal studies: Development and validation. *J Chronic Dis* 40: 373-383. doi: 10.1016/0021-9681(87)90171-8. PubMed: 3558716.
7. Newschaffer CJ, Bush TL, Penberthy LE, Bellantoni M, Helzlsouer K et al. (1998) Does comorbid disease interact with cancer? An epidemiologic analysis of mortality in a cohort of elderly breast cancer patients. *J Gerontol A Biol Sci Med Sci* 53: M372-M378. PubMed: 9754143.
8. Frank L (2000) Epidemiology. When an entire country is a cohort. *Science* 287: 2398-2399. doi:10.1126/science.287.5462.2398. PubMed: 10766613.
9. Pedersen CB, Gøtzsche H, Møller JO, Mortensen PB (2006) The Danish Civil Registration System. A cohort of eight million persons. *Dan Med Bull* 53: 441-449. PubMed: 17150149.
10. Storm HH, Michelsen EV, Clemmensen IH, Pihl J (1997) The Danish Cancer Registry--history, content, quality and use. *Dan Med Bull* 44: 535-539. PubMed: 9408738.
11. Gjerstorff ML (2011) The Danish Cancer Registry. *Scand J Public Health* 39: 42-45. doi:10.1177/1403494810393562. PubMed: 21775350.
12. Andersen TF, Madsen M, Jørgensen J, Mellemkjoer L, Olsen JH (1999) The Danish National Hospital Register. A valuable source of data for modern health sciences. *Dan Med Bull* 46: 263-268. PubMed: 10421985.
13. Rothman KJ, Greenland S, Lash TL (2008) Concepts of interaction. In: *Modern Epidemiology*. Philadelphia: Lippincott Williams & Wilkins. pp. 71-86.
14. Jensen AR, Overgaard J, Storm HH (2002) Validity of breast cancer in the Danish Cancer Registry. A study based on clinical records from one county in Denmark. *Eur J Cancer Prev* 11: 359-364. doi: 10.1097/00008469-200208000-00007. PubMed: 12195162.
15. Thygesen SK, Christiansen CF, Christensen S, Lash TL, Sørensen HT (2011) The predictive value of ICD-10 diagnostic coding used to assess Charlson Comorbidity Index conditions in the population-based Danish National Registry of Patients. *BMC Med Res Methodol* 11: 83. doi: 10.1186/1471-2288-11-83. PubMed: 21619668.
16. Greenland S (1980) The effect of misclassification in the presence of covariates. *Am J Epidemiol* 112: 564-569. PubMed: 7424903.
17. Snyder CF, Frick KD, Herbert RJ, Blackford AL, Neville BA et al. (2013) Quality of care for comorbid conditions during the transition to survivorship: Differences between cancer survivors and noncancer controls. *J Clin Oncol* 31: 1140-1148. doi:10.1200/JCO.2012.43.0272. PubMed: 23401438.
18. Gonzalez EC, Ferrante JM, Van Durme DJ, Pal N, Roetzheim RG (2001) Comorbid illness and the early detection of cancer. *South Med J* 94: 913-920. doi:10.1097/00007611-200109000-00020. PubMed: 11592754.
19. Lash TL, Silliman RA, Guadagnoli E, Mor V (2000) The effect of less than definitive care on breast carcinoma recurrence and mortality. *Cancer* 89: 1739-1747. doi:10.1002/1097-0142(20001015)89:8. PubMed: 11042569.
20. Schonberg MA, Marcantonio ER, Li D, Silliman RA, Ngo L et al. (2010) Breast cancer among the oldest old: Tumor characteristics, treatment choices, and survival. *J Clin Oncol* 28: 2038-2045. doi:10.1200/JCO.2009.25.9796. PubMed: 20308658.
21. Gorin SS, Heck JE, Albert S, Hershman D (2005) Treatment for breast cancer in patients with alzheimer's disease. *J Am Geriatr Soc* 53: 1897-1904. doi:10.1111/j.1532-5415.2005.00467.x. PubMed: 16274370.
22. Gupta SK, Lamont EB (2004) Patterns of presentation, diagnosis, and treatment in older patients with colon cancer and comorbid dementia. *J Am Geriatr Soc* 52: 1681-1687. doi:10.1111/j.1532-5415.2004.52461.x. PubMed: 15450045.
23. Raji MA, Kuo YF, Freeman JL, Goodwin JS (2008) Effect of a dementia diagnosis on survival of older patients after a diagnosis of breast, colon, or prostate cancer: Implications for cancer care. *Arch Intern Med* 168: 2033-2040. doi:10.1001/archinte.168.18.2033. PubMed: 18852406.
24. Bush D, Smith B, Younger J, Michaelson JS (2011) The non-breast-cancer death rate among breast cancer patients. *Breast Cancer Res Treat* 127: 243-249. doi:10.1007/s10549-010-1186-3. PubMed: 20927583.
25. Baade PD, Fritschi L, Eakin EG (2006) Non-cancer mortality among people diagnosed with cancer (Australia). *Cancer Causes Control* 17: 287-297. doi:10.1007/s10552-005-0530-0. PubMed: 16489536.
26. Riihimäki M, Thomsen H, Brandt A, Sundquist J, Hemminki K (2012) Death causes in breast cancer patients. *Ann Oncol* 23: 604-610. doi: 10.1093/annonc/mdr160. PubMed: 21586686.
27. Peairs KS, Barone BB, Snyder CF, Yeh HC, Stein KB et al. (2011) Diabetes mellitus and breast cancer outcomes: A systematic review and meta-analysis. *J Clin Oncol* 29: 40-46. doi:10.1200/JCO.2009.27.3011. PubMed: 21115865.
28. Launay-Vacher V, Oudard S, Janus N, Gligorov J, Pourrat X et al. (2007) Prevalence of renal insufficiency in cancer patients and implications for anticancer drug management: The renal insufficiency and anticancer medications (IRMA) study. *Cancer* 110: 1376-1384. doi: 10.1002/cncr.22904. PubMed: 17634949.
